# Supplementary material for: Influence of Different Vegetation Types on Soil Physicochemical Parameters and Fungal Communities
Source: MDPI journal article supplement (doi:10.3390/microorganisms10040829), 2022-04-16
Supplement: s1 [file s1]

# Supplementary Files

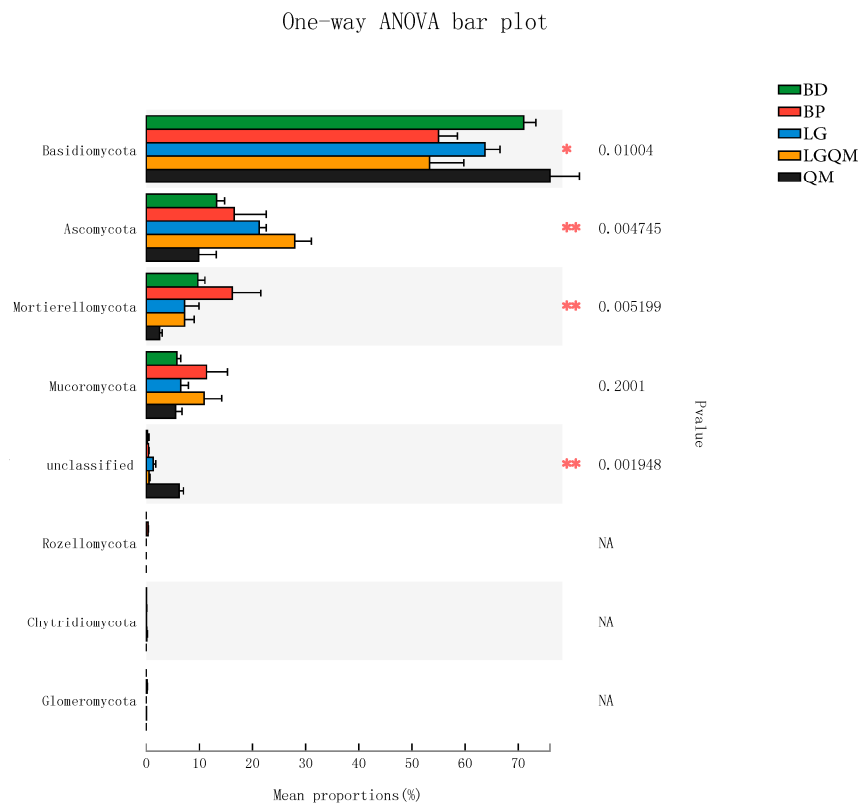

**Figure S1.** one-way ANOVA of the relative abundances of fungal phyla in different revegetation types.

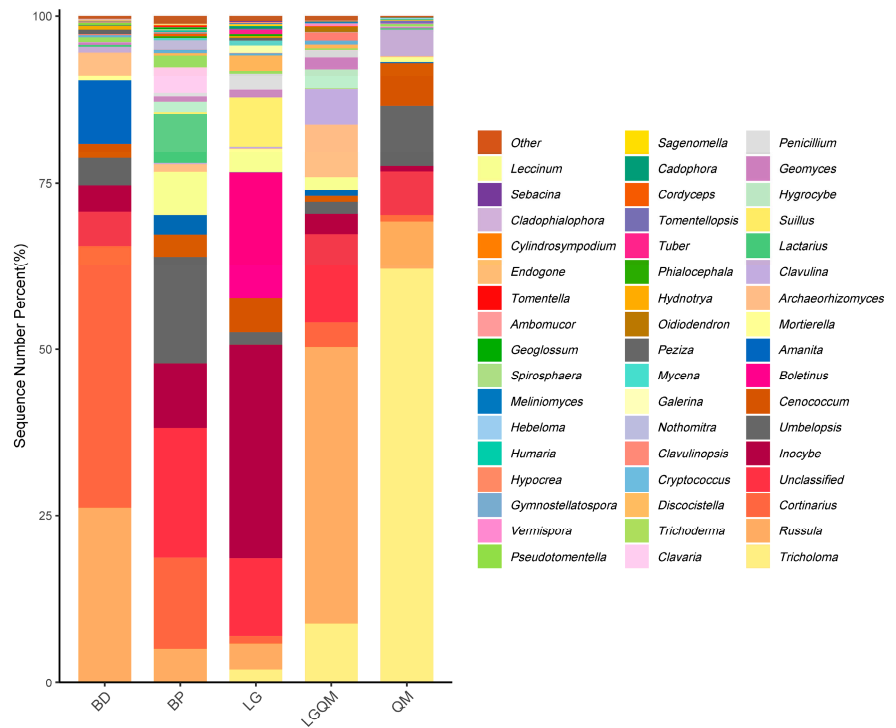

**Figure S2.** Relative abundance of fungal genera in five different revegetation types.

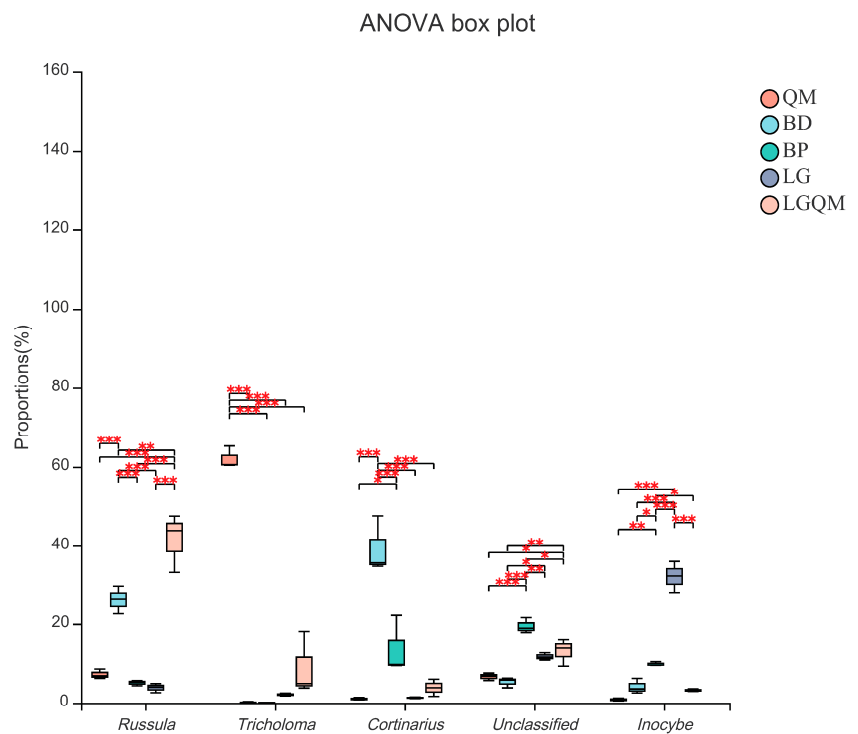

**Figure S3.** one-way ANOVA of the relative abundances of fungal genera in different revegetation types.
